# Supplementary material
Source: publisher figshare collection journal article supplement (https://plos.figshare.com/articles/dataset/_/1506603)
Supplement: Supplementary file [file 1]

**S6 Table. Primer and probe sequences used for SDDV qPCR and RSIV PCR**

| <b>Primer</b>    | <b>Sequence (5'-3')</b>              |
|------------------|--------------------------------------|
| SDDV-50-FW       | CAG TGC ATT ACA AGA AAG              |
| SDDV-143-PROBE   | 6FAM-ATG CCG TCA TTG TAA CAC TG-BHQ1 |
| SDDV-213-REV     | GCT GAA ACA ACA ATT TAG              |
| RSIV IRIDO-FW-5  | CGT GAG ACC GTG CGT AGT              |
| RSIV IRIDO-REV-5 | AGG GTG ACG GTC GAT ATG              |
